# Supplementary material
Source: HighWire-hosted journal article supplement (http://www.jneurosci.org/highwire/filestream/600500/field_highwire_adjunct_files/6/Figure_S7.pdf)

***ast*<sup>ti272</sup>**

control MO

*dcc*-MO1*ntn1a/ntn1b* MO $\alpha$ -AT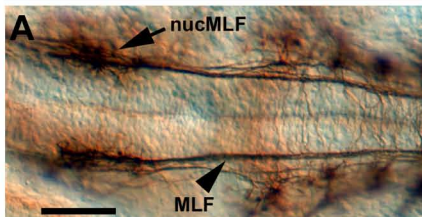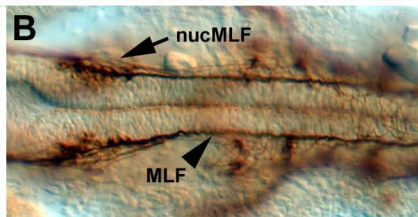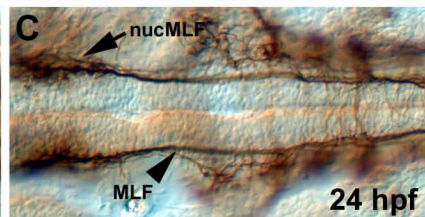

3A10

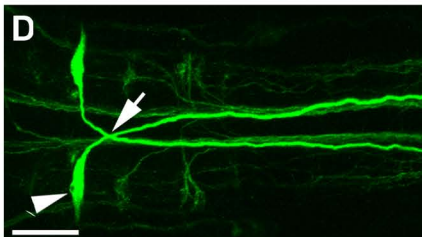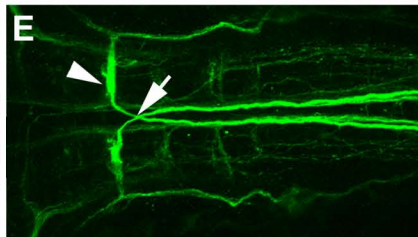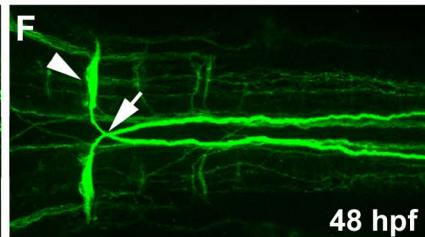*th*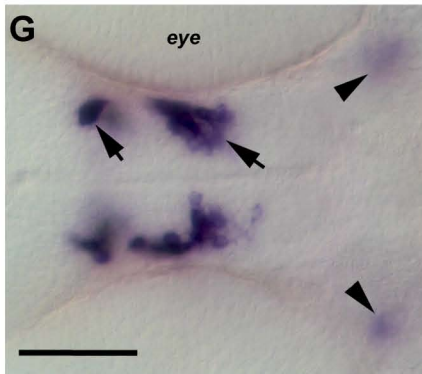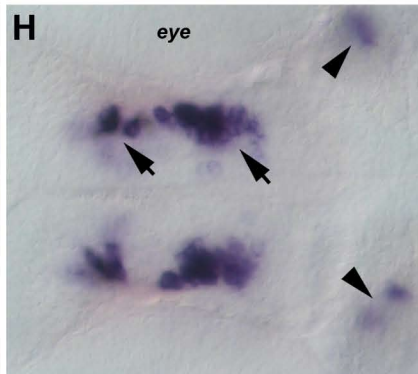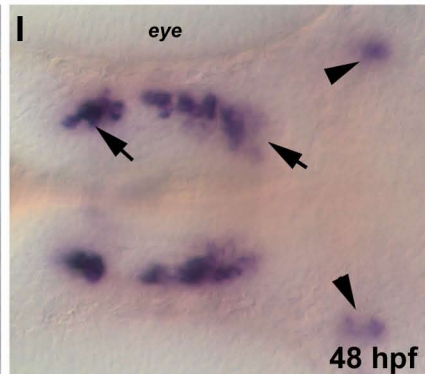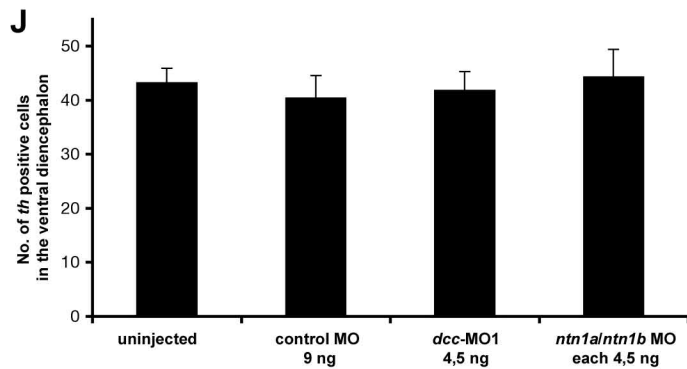

Supplement: Figure_S7.pdf [file Figure_S7.pdf]
